# Supplementary material for: Understanding the Implementation of “Sit Less at Work” Interventions in Three Organisations: A Mixed Methods Process Evaluation
Source: Int J Environ Res Public Health. 2021 Jul 9;18(14):7361. doi: 10.3390/ijerph18147361 (PMC8304152; doi:10.3390/ijerph18147361)
Supplement: Supplementary file 1 [file ijerph-18-07361-s001.zip]

Archive with 5 entries (5 files):
- Eval Paper_Table S1.pdf
- Eval Paper_Table S2.pdf
- Eval Paper_Table S3.pdf
- Eval Paper_Table S4.pdf
- Eval Paper_Table S5.pdf
