# Supplementary material for: Understanding the Implementation of “Sit Less at Work” Interventions in Three Organisations: A Mixed Methods Process Evaluation
Source: Int J Environ Res Public Health. 2021 Jul 9;18(14):7361. doi: 10.3390/ijerph18147361 (PMC8304152; doi:10.3390/ijerph18147361)
Supplement: Supplementary file 1 [file ijerph-18-07361-s001.zip › Eval Paper_Table S5.pdf]

**Table S5a.** Awareness of the “Sit Less at Work” intervention in the small business (total responses n=5)

| <b>Awareness of:</b>                                                                           | <b>Yes (n)</b> |
|------------------------------------------------------------------------------------------------|----------------|
| The “Sit Less at Work” intervention as a whole                                                 | 5              |
| Regular emails from Managing Director                                                          | 3              |
| Using computer prompts                                                                         | 2              |
| Using exercise ball instead of chair                                                           | 2              |
| Competitions e.g., computer games, ping pong, press-ups                                        | 4              |
| Rota for walking to the shops for lunch/snacks                                                 | 2              |
| Exercises with office dumbbells                                                                | 5              |
| Using wireless headsets                                                                        | 2              |
| Social media promotion of “Sit Less at Work”                                                   | 4              |
| Inclusion of “Sit Less at Work” as an agenda item in team meetings and in the Wellbeing Policy | 2              |
| Other initiative not listed above                                                              | 2              |
| Unaware of any “Sit Less at Work” initiatives                                                  | 0              |

**Table S5b.** Awareness of the “Sit Less at Work” intervention in the charity (total responses n=9)

| <b>Awareness of:</b>                                            | <b>Yes (n)</b> |
|-----------------------------------------------------------------|----------------|
| The “Sit Less at Work” intervention as a whole                  | 9              |
| Regular communications re. “Sit Less at Work” intervention      | 8              |
| Encouragement to set personal targets for steps per day         | 3              |
| Sit less success stories being celebrated on the intranet       | 1              |
| Encouragement to join or set-up lunchtime walking/running group | 3              |
| The clear office / desk policy                                  | 5              |
| Team meetings incorporated periods of standing/moving           | 4              |
| Policy changes to support sitting less at work                  | 1              |
| Other initiative not listed above                               | 0              |

|                                               |   |
|-----------------------------------------------|---|
| Unaware of any “Sit Less at Work” initiatives | 0 |
|-----------------------------------------------|---|

**Table S5c.** Awareness of the “Sit Less at Work” intervention in the local authority (total responses n=28)

| <b>Awareness of:</b>                                                          | <b>Yes (n)</b> |
|-------------------------------------------------------------------------------|----------------|
| The “Sit Less at Work” intervention as a whole                                | 25             |
| Regular communications with suggestions to sit less at work                   | 12             |
| Encouragement to lead or participate in step competitions                     | 2              |
| Team standing breaks                                                          | 2              |
| Posters near photocopiers to encourage stretches                              | 13             |
| Posters and stands in meeting rooms to encourage sitting less and moving more | 10             |
| The inclusion of some standing or moving in team meetings                     | 2              |
| The inclusion of sitting less and moving more in 1:1s                         | 1              |
| The inclusion of sitting less and moving more in workplace guidelines         | 5              |
| Other initiative not listed above                                             | 6              |
| Unaware of any “Sit Less at Work” initiatives                                 | 2              |
